# Supplementary material for: Efficacy and Safety of Bruton Tyrosine Kinase Inhibitor Monotherapy Compared with Combination Therapy for Chronic Lymphocytic Leukemia and Small Lymphocytic Lymphoma: A Systematic Review and Meta-Analysis
Source: MDPI journal article supplement (doi:10.3390/cancers15071996), 2023-03-27
Supplement: s1 [file s1]

**Table S1.** Search strategy (all fields included).

| PubMed |                                                                                                                                                                                                                                                                                                                                                                                                                                                                                                                                                                                                                                                                                                                                                                                                                                                                                                                                                                                                                                                                                                                                                                                                                                                                                                                                                                                                                                                                                                                                                                                                                                                                                                                                                                                                                                                                                                                                              |         |
|--------|----------------------------------------------------------------------------------------------------------------------------------------------------------------------------------------------------------------------------------------------------------------------------------------------------------------------------------------------------------------------------------------------------------------------------------------------------------------------------------------------------------------------------------------------------------------------------------------------------------------------------------------------------------------------------------------------------------------------------------------------------------------------------------------------------------------------------------------------------------------------------------------------------------------------------------------------------------------------------------------------------------------------------------------------------------------------------------------------------------------------------------------------------------------------------------------------------------------------------------------------------------------------------------------------------------------------------------------------------------------------------------------------------------------------------------------------------------------------------------------------------------------------------------------------------------------------------------------------------------------------------------------------------------------------------------------------------------------------------------------------------------------------------------------------------------------------------------------------------------------------------------------------------------------------------------------------|---------|
| No     | Query                                                                                                                                                                                                                                                                                                                                                                                                                                                                                                                                                                                                                                                                                                                                                                                                                                                                                                                                                                                                                                                                                                                                                                                                                                                                                                                                                                                                                                                                                                                                                                                                                                                                                                                                                                                                                                                                                                                                        | Results |
| #1     | "chronic lymphocytic leukaemia"[All Fields] OR "leukemia, lymphocytic, chronic, b cell"[MeSH Terms] OR ("leukemia"[All Fields] AND "lymphocytic"[All Fields] AND "chronic"[All Fields] AND "b cell"[All Fields]) OR "b-cell chronic lymphocytic leukemia"[All Fields] OR ("chronic"[All Fields] AND "lymphocytic"[All Fields] AND "leukemia"[All Fields]) OR "chronic lymphocytic leukemia"[All Fields] OR "CLL"[All Fields] OR ("leukemia, lymphocytic, chronic, b cell"[MeSH Terms] OR ("leukemia"[All Fields] AND "lymphocytic"[All Fields] AND "chronic"[All Fields] AND "b cell"[All Fields]) OR "b-cell chronic lymphocytic leukemia"[All Fields] OR ("small"[All Fields] AND "lymphocytic"[All Fields] AND "lymphoma"[All Fields]) OR "small lymphocytic lymphoma"[All Fields]) OR ("sign lang linguist"[Journal] OR "sll"[All Fields])                                                                                                                                                                                                                                                                                                                                                                                                                                                                                                                                                                                                                                                                                                                                                                                                                                                                                                                                                                                                                                                                                               | 34,906  |
| #2     | "ibrutinib"[Supplementary Concept] OR "ibrutinib"[All Fields] OR "ibrutinib s"[All Fields] OR ("ibrutinib"[Supplementary Concept] OR "ibrutinib"[All Fields] OR "imbruvica"[All Fields] OR "ibrutinib s"[All Fields]) OR ("ibrutinib"[Supplementary Concept] OR "ibrutinib"[All Fields] OR "pci 32765"[All Fields]) OR "CRA-032765"[All Fields] OR ("acalabrutinib"[Supplementary Concept] OR "acalabrutinib"[All Fields] OR ("acalabrutinib"[Supplementary Concept] OR "acalabrutinib"[All Fields] OR "calquence"[All Fields]) OR ("acalabrutinib"[Supplementary Concept] OR "acalabrutinib"[All Fields] OR "acp 196"[All Fields])) OR ("zanubrutinib"[Supplementary Concept] OR "zanubrutinib"[All Fields] OR ("zanubrutinib"[Supplementary Concept] OR "zanubrutinib"[All Fields] OR "brukinsa"[All Fields]) OR ("zanubrutinib"[Supplementary Concept] OR "zanubrutinib"[All Fields] OR "bgb 3111"[All Fields])) OR ("tirabrutinib"[Supplementary Concept] OR "tirabrutinib"[All Fields] OR "Vexlebru"[All Fields] OR ("tirabrutinib"[Supplementary Concept] OR "tirabrutinib"[All Fields] OR "ono 4059"[All Fields]) OR ("tirabrutinib"[Supplementary Concept] OR "tirabrutinib"[All Fields] OR "gs 4059"[All Fields])) OR "Orelabrutinib"[All Fields] OR ("pirtobrutinib"[Supplementary Concept] OR "pirtobrutinib"[All Fields] OR ("pirtobrutinib"[Supplementary Concept] OR "pirtobrutinib"[All Fields] OR "loxo 305"[All Fields])) OR ("Nemtabrutinib"[All Fields] OR ("arq531"[Supplementary Concept] OR "arq531"[All Fields] OR "arq 531"[All Fields]) OR "MK-1026"[All Fields]) OR ("agammaglobulinaemia tyrosine kinase"[MeSH Terms] OR ("agammaglobulinaemia"[All Fields] AND "tyrosine"[All Fields] AND "kinase"[All Fields]) OR "agammaglobulinaemia tyrosine kinase"[All Fields] OR ("bruton"[All Fields] AND "tyrosine"[All Fields] AND "kinase"[All Fields]) OR "bruton tyrosine kinase"[All Fields] OR "BTK"[All Fields]) | 7,018   |
| #3     | "randomized controlled trial"[Publication Type] OR "randomized controlled trials                                                                                                                                                                                                                                                                                                                                                                                                                                                                                                                                                                                                                                                                                                                                                                                                                                                                                                                                                                                                                                                                                                                                                                                                                                                                                                                                                                                                                                                                                                                                                                                                                                                                                                                                                                                                                                                             | 780,435 |

|                         |                                                                                                                                     |         |
|-------------------------|-------------------------------------------------------------------------------------------------------------------------------------|---------|
|                         | as topic"[MeSH Terms] OR "randomized controlled trial"[All Fields] OR "randomised controlled trial"[All Fields]                     |         |
| #4                      | #1 AND #2 AND #3                                                                                                                    | 106     |
| <b>Embase</b>           |                                                                                                                                     |         |
| #1                      | 'chronic lymphatic leukemia'/exp/mj                                                                                                 | 31,086  |
| #2                      | 'lymphocytic lymphoma'/mj                                                                                                           | 560     |
| #3                      | #2 OR #3                                                                                                                            | 31,275  |
| #4                      | 'bruton tyrosine kinase inhibitor'/exp/mj                                                                                           | 9,111   |
| #5                      | 'ibrutinib'/exp/mj                                                                                                                  | 3,870   |
| #6                      | 'acalabrutinib'/exp/mj                                                                                                              | 492     |
| #7                      | 'zanubrutinib'/exp/mj                                                                                                               | 267     |
| #8                      | 'tirabrutinib'/exp/mj                                                                                                               | 71      |
| #9                      | 'orelabrutinib'/exp/mj                                                                                                              | 31      |
| #10                     | 'pirtobrutinib'/exp/mj                                                                                                              | 50      |
| #11                     | 'nemtabrutinib'/exp/mj                                                                                                              | 10      |
| #12                     | #4 OR #5 OR #6 OR #7 OR #8 OR #9 OR #10 OR #11                                                                                      | 9,157   |
| #19                     | 'randomized controlled trial'/exp                                                                                                   | 749,487 |
| #20                     | #3 AND #12 AND #19                                                                                                                  | 217     |
| <b>MEDLINE</b>          |                                                                                                                                     |         |
| #1                      | chronic lymphocytic leukemia.mp. or Leukemia, Lymphocytic, Chronic, B-Cell/ OR CLL.mp. OR small lymphocytic lymphoma.mp. OR SLL.mp. | 29,362  |
| #2                      | bruton tyrosine kinase inhibitor.mp. OR BTK.mp.                                                                                     | 3,956   |
| #3                      | ibrutinib.mp. OR Imbruvica.mp. OR PCI-32765.mp.                                                                                     | 3,386   |
| #4                      | acalabrutinib.mp. OR Calquence.mp. OR ACP-196.mp.                                                                                   | 378     |
| #5                      | zanubrutinib.mp. OR Brukinsa.mp. OR BGB-3111.mp.                                                                                    | 221     |
| #6                      | Tirabrutinib.mp. OR Velexbu.mp. OR ONO-4059.mp. OR GS-4059.mp.                                                                      | 90      |
| #7                      | Orelabrutinib.mp.                                                                                                                   | 16      |
| #8                      | Pirtobrutinib.mp. OR LOXO-305.mp.                                                                                                   | 34      |
| #9                      | Nemtabrutinib.mp. OR ARQ 531.mp.                                                                                                    | 13      |
| #10                     | #2 OR #3 OR #4 OR #5 OR #6 OR #7 OR #8 OR #9                                                                                        | 6,233   |
| #21                     | randomized controlled trial.mp. or Randomized Controlled Trial/                                                                     | 626,019 |
| #22                     | #1 AND #10 AND #21                                                                                                                  | 63      |
| <b>Cochrane library</b> |                                                                                                                                     |         |
| #1                      | chronic lymphocytic leukemia OR CLL OR small lymphocytic lymphoma OR SLL                                                            | 2,580   |
| #2                      | Bruton tyrosine kinase inhibitor OR BTK                                                                                             | 699     |
| #3                      | Ibrutinib OR Imbruvica OR PCI-32765 OR CRA-032765                                                                                   | 739     |
| #4                      | Acalabrutinib OR Calquence OR ACP-196                                                                                               | 169     |
| #5                      | Zanubrutinib OR Brukinsa OR BGB-3111                                                                                                | 91      |
| #6                      | Tirabrutinib OR Velexbu OR ONO-4059 OR GS-4059                                                                                      | 32      |
| #7                      | Orelabrutinib                                                                                                                       | 8       |
| #8                      | Pirtobrutinib OR LOXO-305                                                                                                           | 33      |

|       |                                              |         |
|-------|----------------------------------------------|---------|
| #9    | Nemtabrutinib OR ARQ 531 OR MK-1026          | 2       |
| #10   | #2 OR #3 OR #4 OR #5 OR #6 OR #7 OR #8 OR #9 | 1,202   |
| #11   | randomized controlled trial                  | 970,621 |
| #12   | #1 AND #10 AND #11                           | 448     |
| Total |                                              | 834     |

**Table S2.** Summary of subgroup analyses of progression-free survival.

| Subgroup analysis                     | Hazard ratio | 95% Confident interval | I <sup>2</sup> (%) | P value |
|---------------------------------------|--------------|------------------------|--------------------|---------|
| Age <65 years                         | 0.23         | 0.15-0.34              | 0                  | 0.92    |
| Age ≥65 years                         | 0.26         | 0.20-0.34              | 30                 | 0.24    |
| Male                                  | 0.30         | 0.23-0.39              | 6                  | 0.34    |
| Female                                | 0.27         | 0.17-0.42              | 56                 | 0.11    |
| Raji stage 0-II or Binet stage A or B | 0.26         | 0.15-0.45              | 75                 | 0.02    |
| Rai stage III/IV or Binet stage C     | 0.31         | 0.24-0.42              | 0                  | 0.46    |
| Bulky disease <5 cm                   | 0.31         | 0.24-0.42              | 0                  | 0.43    |
| Bulky disease ≥5 cm                   | 0.25         | 0.14-0.45              | 76                 | 0.02    |
| IGHV unmutated                        | 0.22         | 0.14-0.35              | 79                 | < 0.01  |
| IGHV mutated                          | 0.61         | 0.42-0.90              | 0                  | 0.45    |
| Presence of del(17p)                  | 0.15         | 0.08-0.26              | 0                  | 0.71    |
| Chromosome 11q deletion               | 0.18         | 0.10-0.30              | 31                 | 0.24    |

**Abbreviations:** IGHV, unmutated immunoglobulin heavy chain variable; TP53, tumor protein 53.

**Table S3.** Summary of adverse events associated with infusion-related reactions.

| Infusion-related reaction     | BTK inhibitor monotherapy |          |       | Combination therapy |          |       |
|-------------------------------|---------------------------|----------|-------|---------------------|----------|-------|
|                               | Any grade                 | ≥Grade 3 | Total | Any grade           | ≥Grade 3 | Total |
| Woyach JA <i>et al.</i> 2018  | NR                        | 0        | 180   | NR                  | 11       | 176   |
| Ghia P <i>et al.</i> 2020     | 1                         | 0        | 154   | 17                  | 3        | 153   |
| Sharman JP <i>et al.</i> 2020 | 0                         | 0        | 179   | 68                  | 10       | 169   |
| Tam CS <i>et al.</i> 2022     | 1                         | 0        | 240   | 43                  | 6        | 227   |

**Abbreviations:** BTK, Bruton tyrosine kinase; NR, not reported.

**Table S4.** Summary of adverse events associated with secondary primary malignancies.

| Secondary primary malignancies            | BTK inhibitor |            | Combination therapy |            | Risk ratio  | 95% Confident interval | I <sup>2</sup> (%) | P value     |
|-------------------------------------------|---------------|------------|---------------------|------------|-------------|------------------------|--------------------|-------------|
|                                           | Events        | Total      | Event               | Total      |             |                        |                    |             |
| SPM any grade                             | 83            | 573        | 34                  | 549        | 2.49        | 0.64-9.70              | 62                 | 0.07        |
| <b>SPM of grade 3 or higher</b>           | <b>45</b>     | <b>753</b> | <b>20</b>           | <b>725</b> | <b>2.09</b> | <b>1.01-4.36</b>       | <b>0</b>           | <b>0.53</b> |
| SPM excluding non-melanoma skin any grade | 34            | 573        | 14                  | 549        | 2.24        | 0.55-9.06              | 4                  | 0.35        |
| SPM excluding non-melanoma skin grade ≥3  | 28            | 573        | 10                  | 549        | 2.58        | 0.86-7.77              | 0                  | 0.62        |

**Abbreviations:** BTK, Bruton tyrosine kinase; SPM, secondary primary malignancies; NR, not reported.

**Table S5.** PRISMA 2020 checklist.

| Section and Topic       | Item # | Checklist item                                                                                                                                                                                                                                                                                       | Location where item is reported |
|-------------------------|--------|------------------------------------------------------------------------------------------------------------------------------------------------------------------------------------------------------------------------------------------------------------------------------------------------------|---------------------------------|
| <b>TITLE</b>            |        |                                                                                                                                                                                                                                                                                                      |                                 |
| Title                   | 1      | Identify the report as a systematic review.                                                                                                                                                                                                                                                          | Page 1                          |
| <b>ABSTRACT</b>         |        |                                                                                                                                                                                                                                                                                                      |                                 |
| Abstract                | 2      | See the PRISMA 2020 for Abstracts checklist.                                                                                                                                                                                                                                                         | Page 1-2                        |
| <b>INTRODUCTION</b>     |        |                                                                                                                                                                                                                                                                                                      |                                 |
| Rationale               | 3      | Describe the rationale for the review in the context of existing knowledge.                                                                                                                                                                                                                          | Page 3                          |
| Objectives              | 4      | Provide an explicit statement of the objective(s) or question(s) the review addresses.                                                                                                                                                                                                               | Page 3-4                        |
| <b>METHODS</b>          |        |                                                                                                                                                                                                                                                                                                      |                                 |
| Eligibility criteria    | 5      | Specify the inclusion and exclusion criteria for the review and how studies were grouped for the syntheses.                                                                                                                                                                                          | Page 4                          |
| Information sources     | 6      | Specify all databases, registers, websites, organisations, reference lists and other sources searched or consulted to identify studies. Specify the date when each source was last searched or consulted.                                                                                            | Page 4                          |
| Search strategy         | 7      | Present the full search strategies for all databases, registers and websites, including any filters and limits used.                                                                                                                                                                                 | Table S1                        |
| Selection process       | 8      | Specify the methods used to decide whether a study met the inclusion criteria of the review, including how many reviewers screened each record and each report retrieved, whether they worked independently, and if applicable, details of automation tools used in the process.                     | Page 4                          |
| Data collection process | 9      | Specify the methods used to collect data from reports, including how many reviewers collected data from each report, whether they worked independently, any processes for obtaining or confirming data from study investigators, and if applicable, details of automation tools used in the process. | Page 4-5                        |
| Data items              | 10a    | List and define all outcomes for which data were sought. Specify whether all results that were compatible with each outcome domain in each study were sought (e.g. for all measures, time points, analyses), and if not, the methods used to decide which results to collect.                        | Page 5                          |
|                         | 10b    | List and define all other variables for which data were sought (e.g. participant and intervention characteristics, funding sources). Describe any assumptions made about any missing or unclear information.                                                                                         | Page 4-5                        |

| Section and Topic             | Item # | Checklist item                                                                                                                                                                                                                                                    | Location where item is reported |
|-------------------------------|--------|-------------------------------------------------------------------------------------------------------------------------------------------------------------------------------------------------------------------------------------------------------------------|---------------------------------|
| Study risk of bias assessment | 11     | Specify the methods used to assess risk of bias in the included studies, including details of the tool(s) used, how many reviewers assessed each study and whether they worked independently, and if applicable, details of automation tools used in the process. | Page 5                          |
| Effect measures               | 12     | Specify for each outcome the effect measure(s) (e.g. risk ratio, mean difference) used in the synthesis or presentation of results.                                                                                                                               | Page 4-5                        |
| Synthesis methods             | 13a    | Describe the processes used to decide which studies were eligible for each synthesis (e.g. tabulating the study intervention characteristics and comparing against the planned groups for each synthesis (item #5)).                                              | Page 4-5                        |
|                               | 13b    | Describe any methods required to prepare the data for presentation or synthesis, such as handling of missing summary statistics, or data conversions.                                                                                                             | Page 4-5                        |
|                               | 13c    | Describe any methods used to tabulate or visually display results of individual studies and syntheses.                                                                                                                                                            | Page 4-5                        |
|                               | 13d    | Describe any methods used to synthesize results and provide a rationale for the choice(s). If meta-analysis was performed, describe the model(s), method(s) to identify the presence and extent of statistical heterogeneity, and software package(s) used.       | Page 4-5                        |
|                               | 13e    | Describe any methods used to explore possible causes of heterogeneity among study results (e.g. subgroup analysis, meta-regression).                                                                                                                              | Page 4-5                        |
|                               | 13f    | Describe any sensitivity analyses conducted to assess robustness of the synthesized results.                                                                                                                                                                      | Page 4-5                        |
| Reporting bias assessment     | 14     | Describe any methods used to assess risk of bias due to missing results in a synthesis (arising from reporting biases).                                                                                                                                           | Page 4-5                        |
| Certainty assessment          | 15     | Describe any methods used to assess certainty (or confidence) in the body of evidence for an outcome.                                                                                                                                                             | Page 4-5                        |
| <b>RESULTS</b>                |        |                                                                                                                                                                                                                                                                   |                                 |
| Study selection               | 16a    | Describe the results of the search and selection process, from the number of records identified in the search to the number of studies included in the review, ideally using a flow diagram.                                                                      | Page 5-6                        |
|                               | 16b    | Cite studies that might appear to meet the inclusion criteria, but which were excluded, and explain why they were excluded.                                                                                                                                       | Page 5-6                        |
| Study characteristics         | 17     | Cite each included study and present its characteristics.                                                                                                                                                                                                         | Page 5-7                        |
| Risk of bias in studies       | 18     | Present assessments of risk of bias for each included study.                                                                                                                                                                                                      | Page 11                         |

| Section and Topic              | Item # | Checklist item                                                                                                                                                                                                                                                                       | Location where item is reported |
|--------------------------------|--------|--------------------------------------------------------------------------------------------------------------------------------------------------------------------------------------------------------------------------------------------------------------------------------------|---------------------------------|
| Results of individual studies  | 19     | For all outcomes, present, for each study: (a) summary statistics for each group (where appropriate) and (b) an effect estimate and its precision (e.g. confidence/credible interval), ideally using structured tables or plots.                                                     | Page 6-8                        |
| Results of syntheses           | 20a    | For each synthesis, briefly summarise the characteristics and risk of bias among contributing studies.                                                                                                                                                                               | Page 7-13                       |
|                                | 20b    | Present results of all statistical syntheses conducted. If meta-analysis was done, present for each the summary estimate and its precision (e.g. confidence/credible interval) and measures of statistical heterogeneity. If comparing groups, describe the direction of the effect. | Page 9-14                       |
|                                | 20c    | Present results of all investigations of possible causes of heterogeneity among study results.                                                                                                                                                                                       | Page 9-14                       |
|                                | 20d    | Present results of all sensitivity analyses conducted to assess the robustness of the synthesized results.                                                                                                                                                                           | Page 9-14                       |
| Reporting biases               | 21     | Present assessments of risk of bias due to missing results (arising from reporting biases) for each synthesis assessed.                                                                                                                                                              | Page 11-13                      |
| Certainty of evidence          | 22     | Present assessments of certainty (or confidence) in the body of evidence for each outcome assessed.                                                                                                                                                                                  | Page 9-14                       |
| <b>DISCUSSION</b>              |        |                                                                                                                                                                                                                                                                                      |                                 |
| Discussion                     | 23a    | Provide a general interpretation of the results in the context of other evidence.                                                                                                                                                                                                    | Page 14-15                      |
|                                | 23b    | Discuss any limitations of the evidence included in the review.                                                                                                                                                                                                                      | Page 16                         |
|                                | 23c    | Discuss any limitations of the review processes used.                                                                                                                                                                                                                                | Page 16                         |
|                                | 23d    | Discuss implications of the results for practice, policy, and future research.                                                                                                                                                                                                       | Page 16-17                      |
| <b>OTHER INFORMATION</b>       |        |                                                                                                                                                                                                                                                                                      |                                 |
| Registration and protocol      | 24a    | Provide registration information for the review, including register name and registration number, or state that the review was not registered.                                                                                                                                       | Page 4                          |
|                                | 24b    | Indicate where the review protocol can be accessed, or state that a protocol was not prepared.                                                                                                                                                                                       | Page 4                          |
|                                | 24c    | Describe and explain any amendments to information provided at registration or in the protocol.                                                                                                                                                                                      | Page 4                          |
| Support                        | 25     | Describe sources of financial or non-financial support for the review, and the role of the funders or sponsors in the review.                                                                                                                                                        | Page 18                         |
| Competing interests            | 26     | Declare any competing interests of review authors.                                                                                                                                                                                                                                   | Page 18                         |
| Availability of data, code and | 27     | Report which of the following are publicly available and where they can be found: template data collection forms; data extracted from included studies; data used for all analyses; analytic code; any other materials used in the review.                                           | Page 18                         |

---

| Section and Topic | Item # | Checklist item | Location where item is reported |
|-------------------|--------|----------------|---------------------------------|
| other materials   |        |                |                                 |



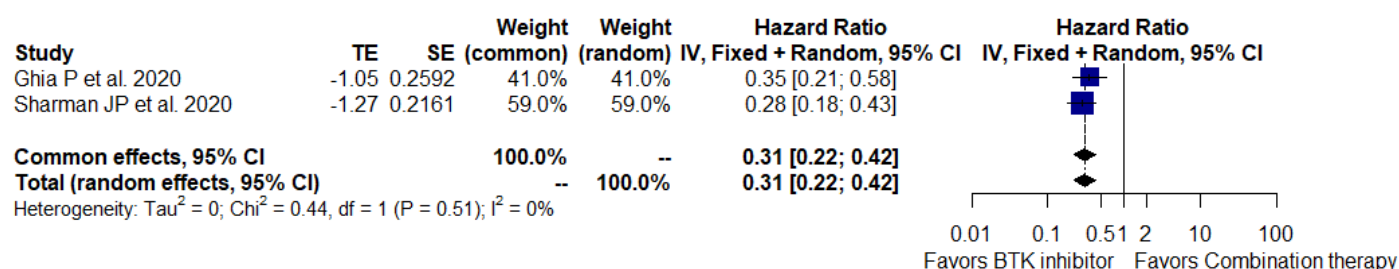

**Figure S1.** Forest plot for time to next treatment [31,43].

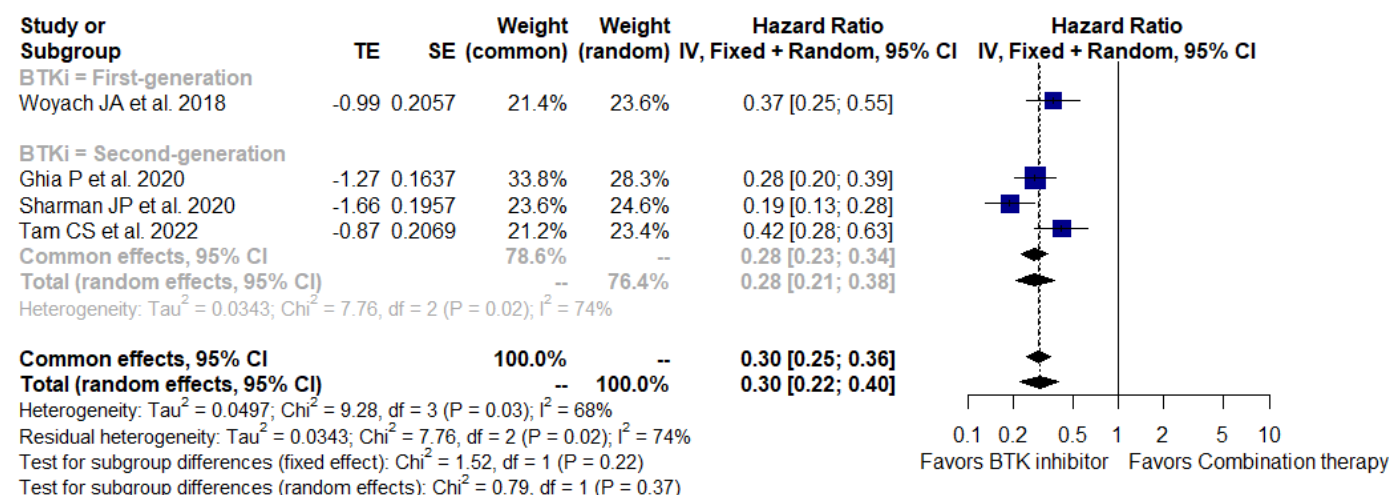

**Figure S2.** Forest plot for progression-free survival (subgroup different generation BTK inhibitors) [26,31,43,46].

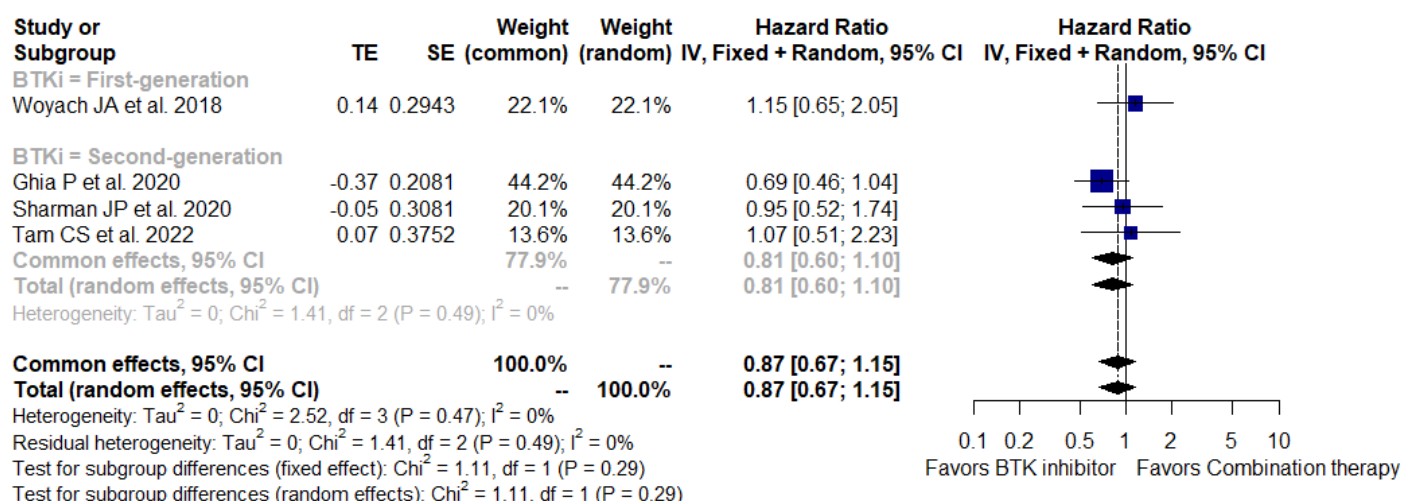

**Figure S3.** Forest plot for overall survival (subgroup different generation BTK inhibitors) [26,31,43,46].

(A)

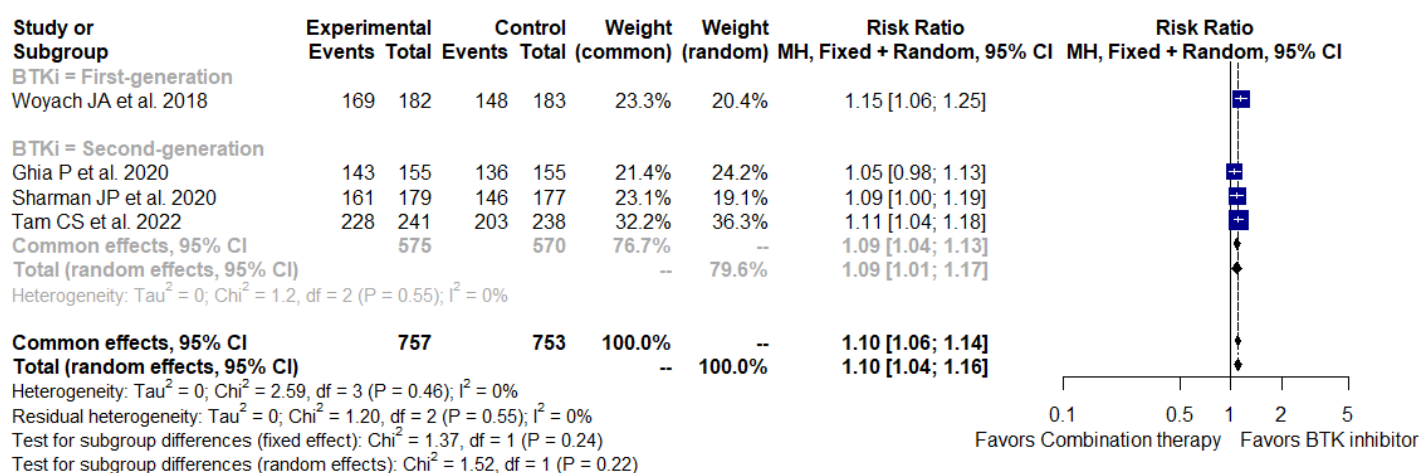

(B)

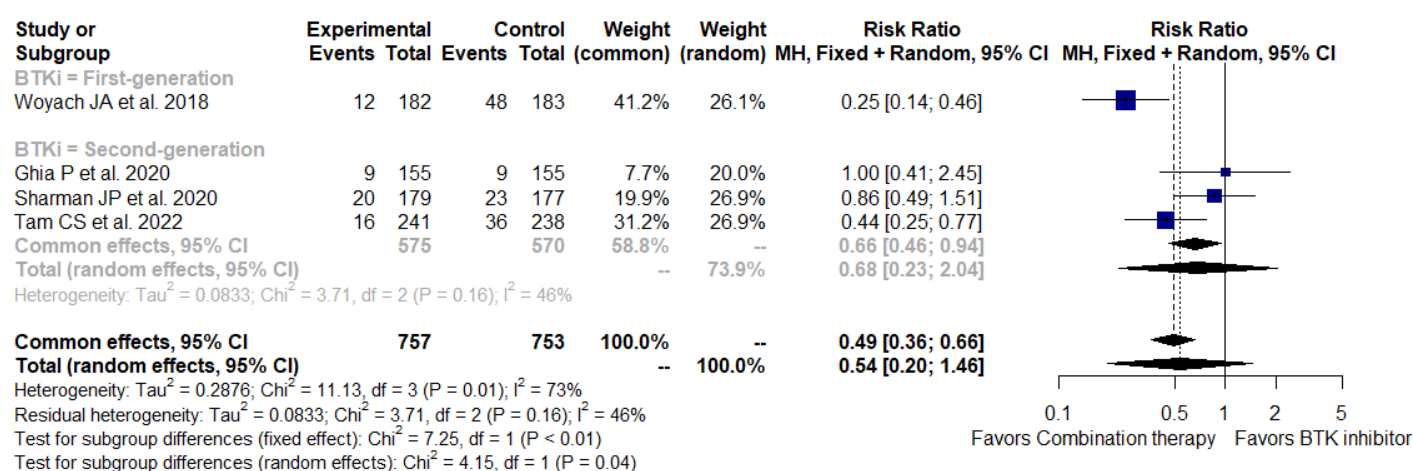

Figure S4. Pooled risk ratios for overall response (A) and complete response (B) (subgroup different generation BTK inhibitors) [26,31,43,46].

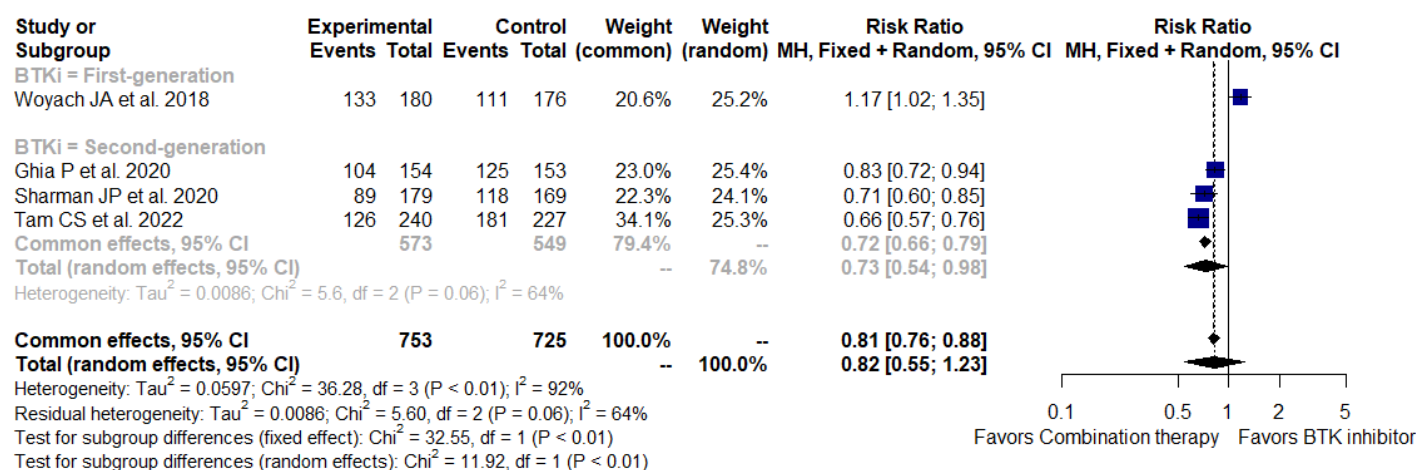

Figure S5. Pooled risk ratios for grade  $\geq 3$  adverse events [26,31,43,46].
